# Supplementary material
Source: Springer Nature journal article supplement (https://www.springermedizin.de/resource/supplementary/12935_2011_329_MOESM4_ESM.pdf/9540410)

**A**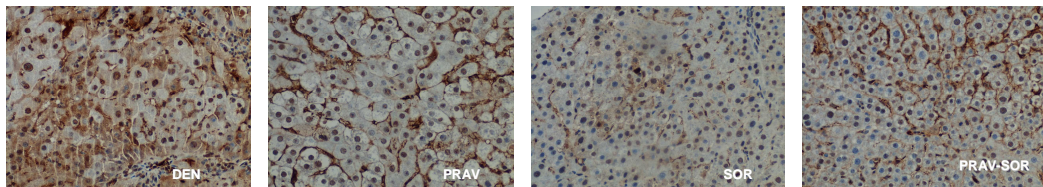**B**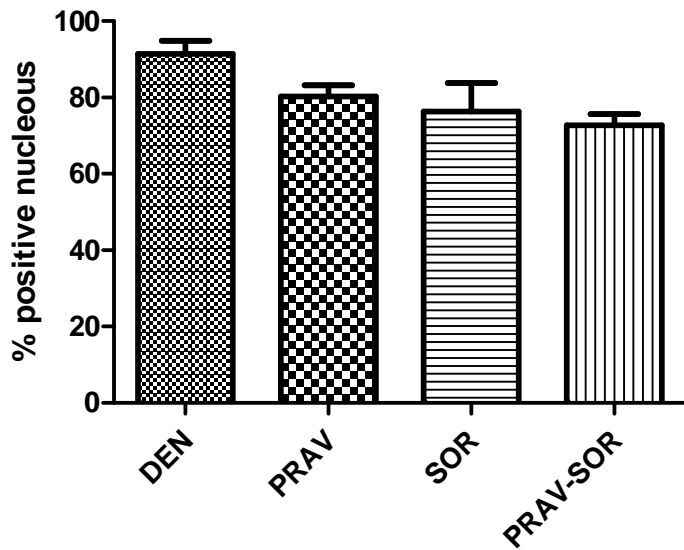

Supplement: MOESM4 [file 9540410]
